# Supplementary material
Source: ML conference proceedings conference paper supplement (https://openreview.net/forum?id=7JlL8ECPJ7)
Supplement: supplementary_material [file attachment]

Diabetes (n=8)

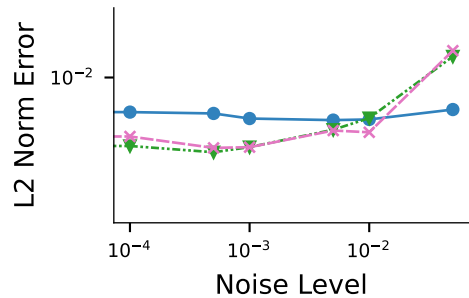

Adult (n=14)

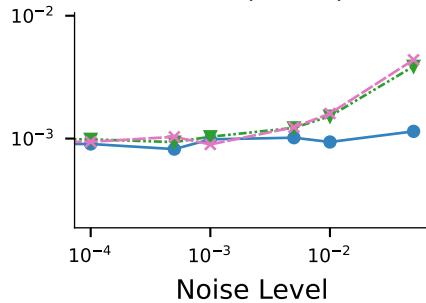

Bank (n=16)

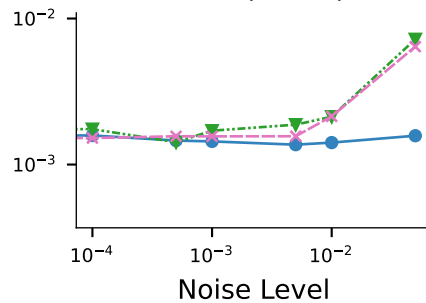

German Credit (n=20)

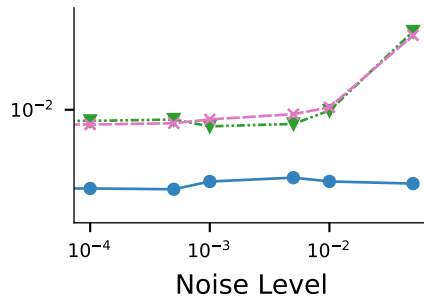

NHANES (n=79)

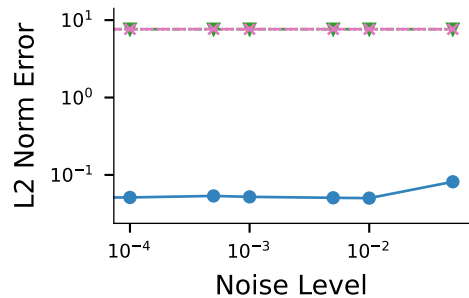

BRCA (n=100)

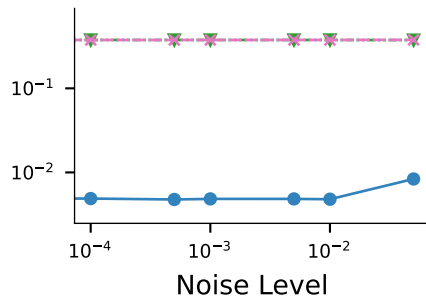

Communities and Crime (n=101)

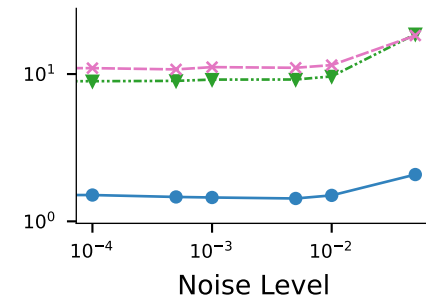

TUANDROMD (n=241)

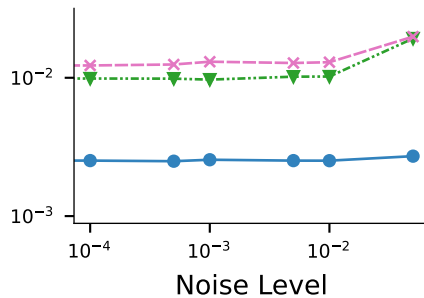

Kernel Banzhaf

Leverage SHAP

Optimized Kernel SHAP
