# Supplementary material
Source: ML conference proceedings conference paper supplement (https://openreview.net/forum?id=7JlL8ECPJ7)
Supplement: supplementary_material [file attachment]

Diabetes (n=8)

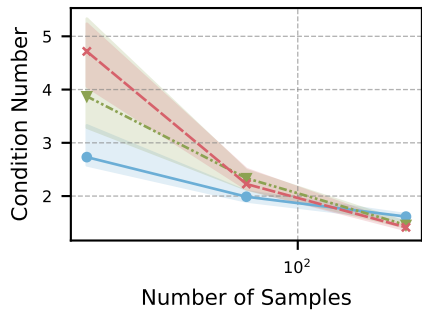

Adult (n=14)

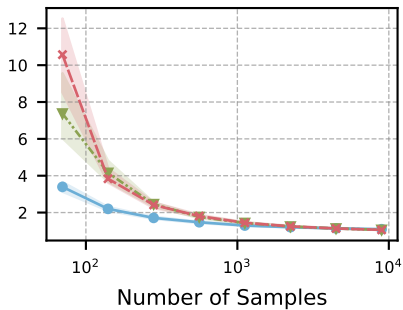

Bank (n=16)

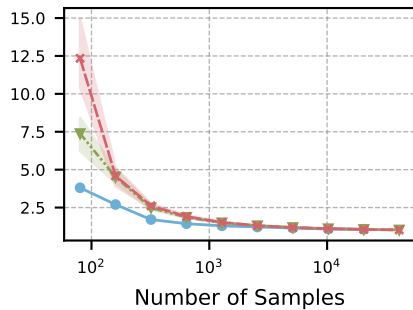

German Credit (n=20)

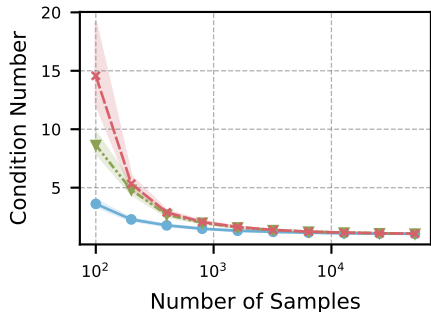

NHANES (n=79)

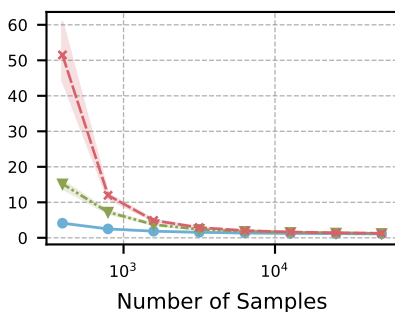

BRCA (n=100)

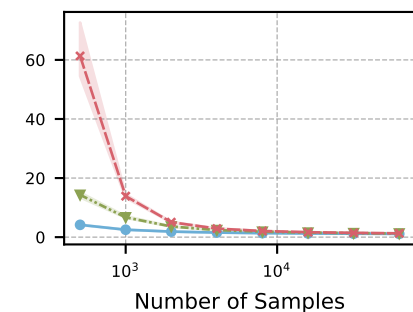

—●— Kernel Banzhaf

- - - ▽ - - - Leverage SHAP

- - - \* - - - Optimized Kernel SHAP
