# Supplementary material
Source: ML conference proceedings conference paper supplement (https://openreview.net/forum?id=7JlL8ECPJ7)
Supplement: supplementary_material [file attachment]

Diabetes (n=8)

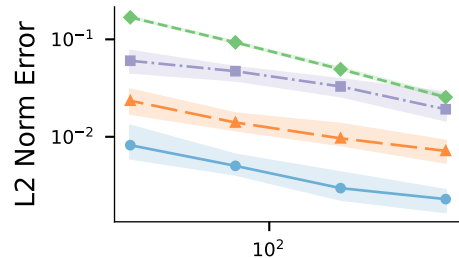

Number of Samples

Adult (n=14)

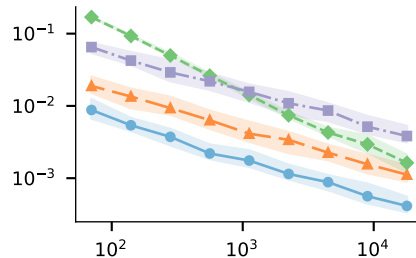

Number of Samples

Bank (n=16)

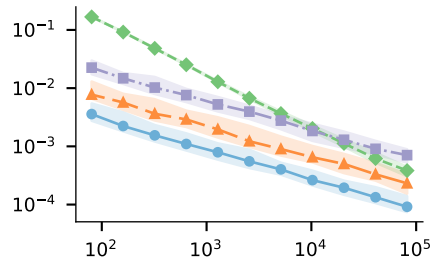

Number of Samples

German Credit (n=20)

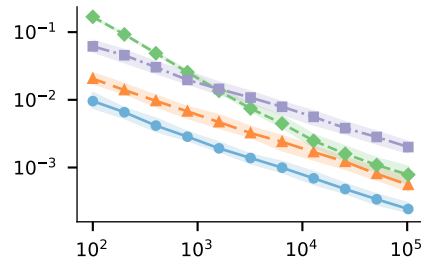

Number of Samples

NHANES (n=79)

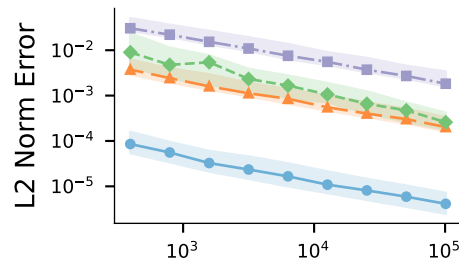

Number of Samples

BRCA (n=100)

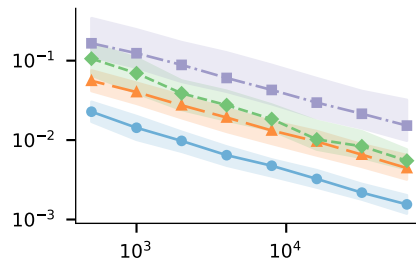

Number of Samples

Communities and Crime (n=101)

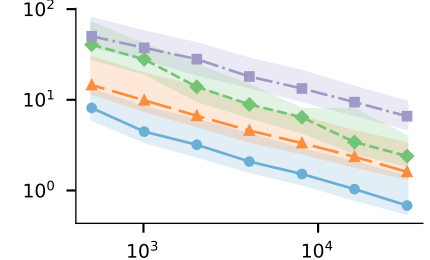

Number of Samples

TUANDROMD (n=241)

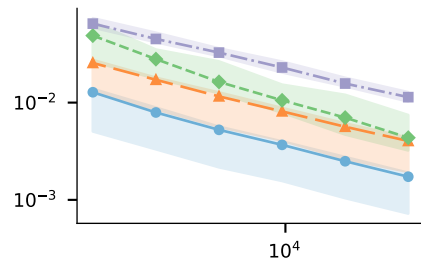

Number of Samples

—●— Kernel Banzhaf   
 -▲- Kernel Banzhaf (excl. Pairs)   
 -◆- MC   
 -■- MSR
