# Supplementary material
Source: ML conference proceedings conference paper supplement (https://openreview.net/forum?id=7JlL8ECPJ7)
Supplement: supplementary_material [file attachment]

Relative Objective Error

Diabetes (n=8)

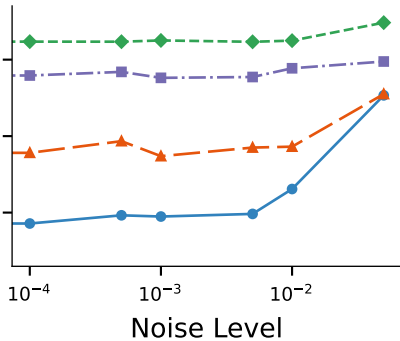

Adult (n=14)

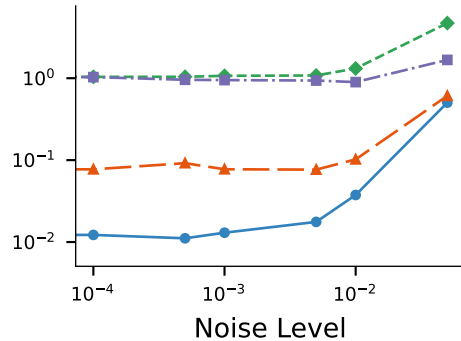

Bank (n=16)

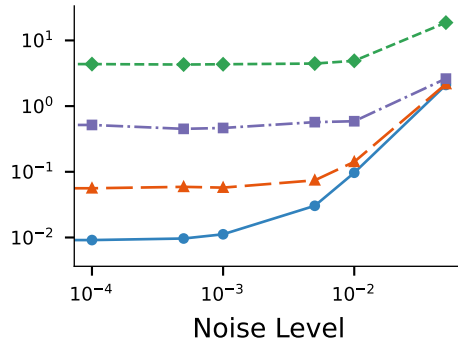

German Credit (n=20)

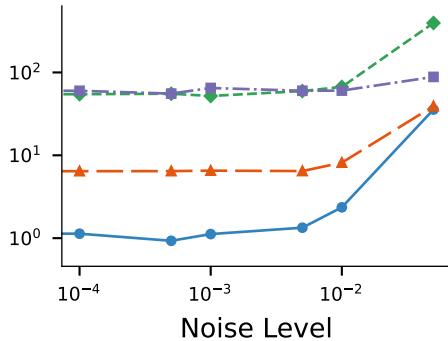

Kernel Banzhaf

Kernel Banzhaf (excl. Pairs)

MC

MSR
