# Supplementary material
Source: ML conference proceedings conference paper supplement (https://openreview.net/forum?id=7JlL8ECPJ7)

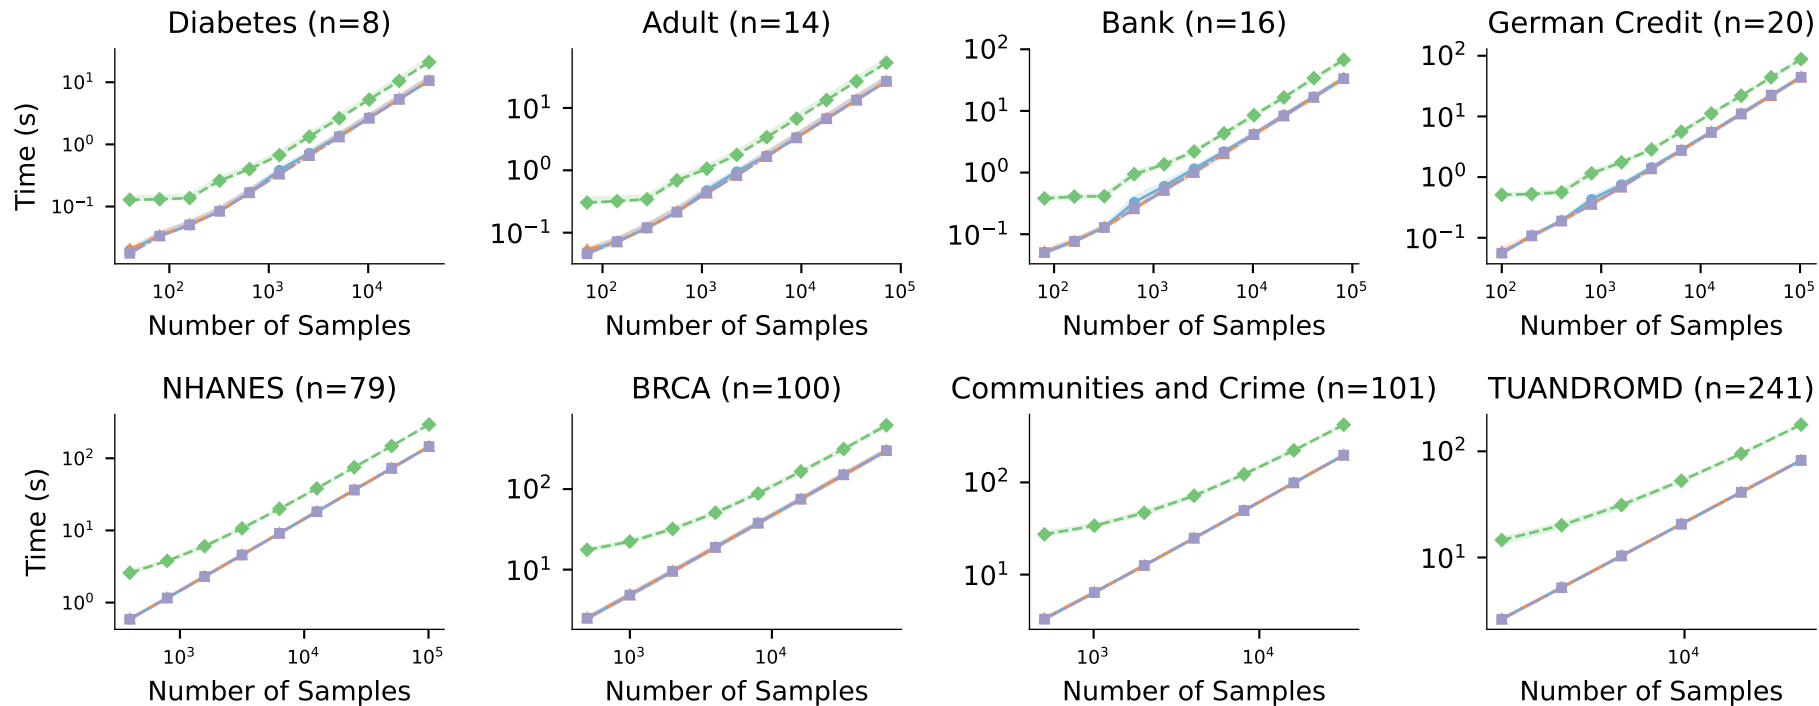

—●— Kernel Banzhaf    -▲- Kernel Banzhaf (excl. Pairs)    -◇- MC    -■- MSR

Supplement: supplementary_material [file attachment]

Diabetes (n=8)

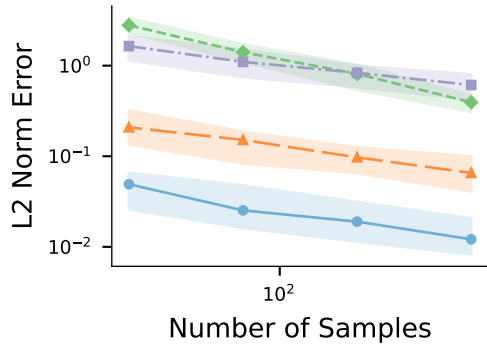

Adult (n=14)

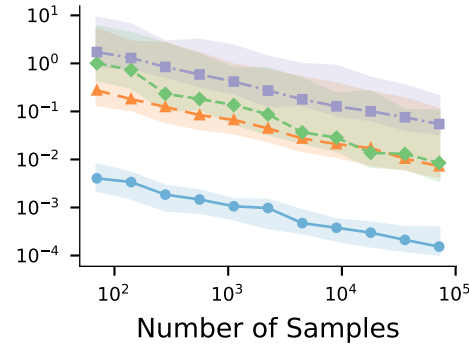

Bank (n=16)

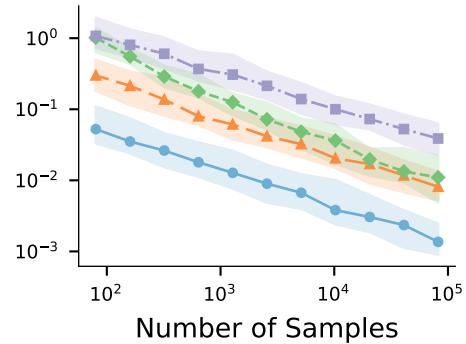

German Credit (n=20)

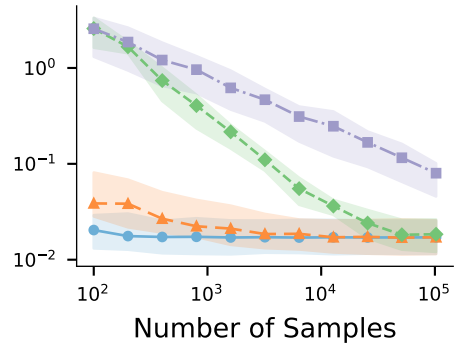

—●— Kernel Banzhaf

-▲- Kernel Banzhaf (excl. Pairs)

-◆- MC

-■- MSR

Supplement: supplementary_material [file attachment]

$n = 10$ 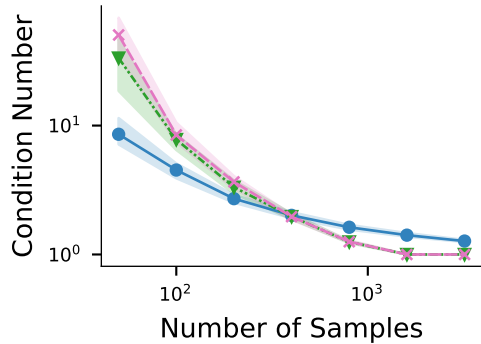 $n = 40$ 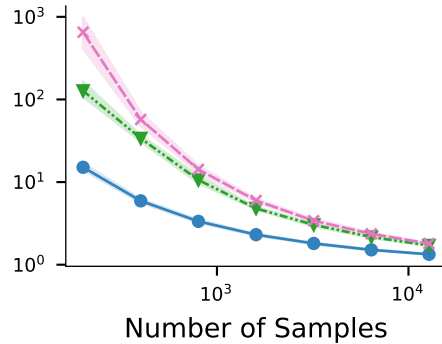 $n = 160$ 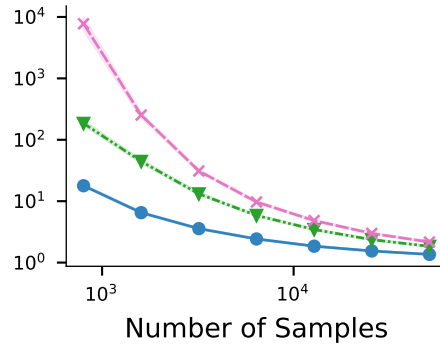 $n = 640$ 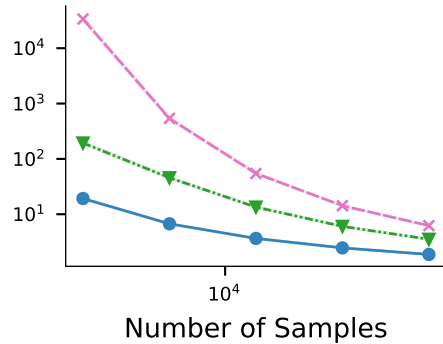

—●— Kernel Banzhaf    -●- Leverage SHAP    -x- Optimized Kernel SHAP

Supplement: supplementary_material [file attachment]

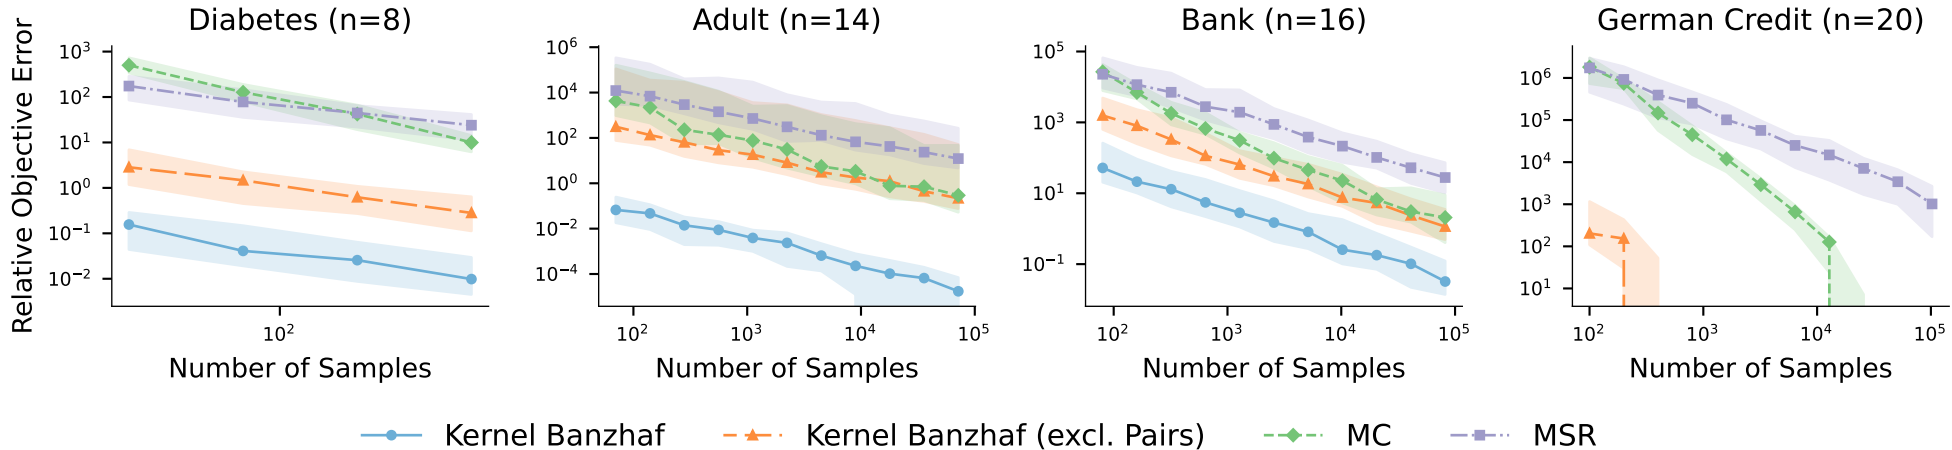

Supplement: supplementary_material [file attachment]

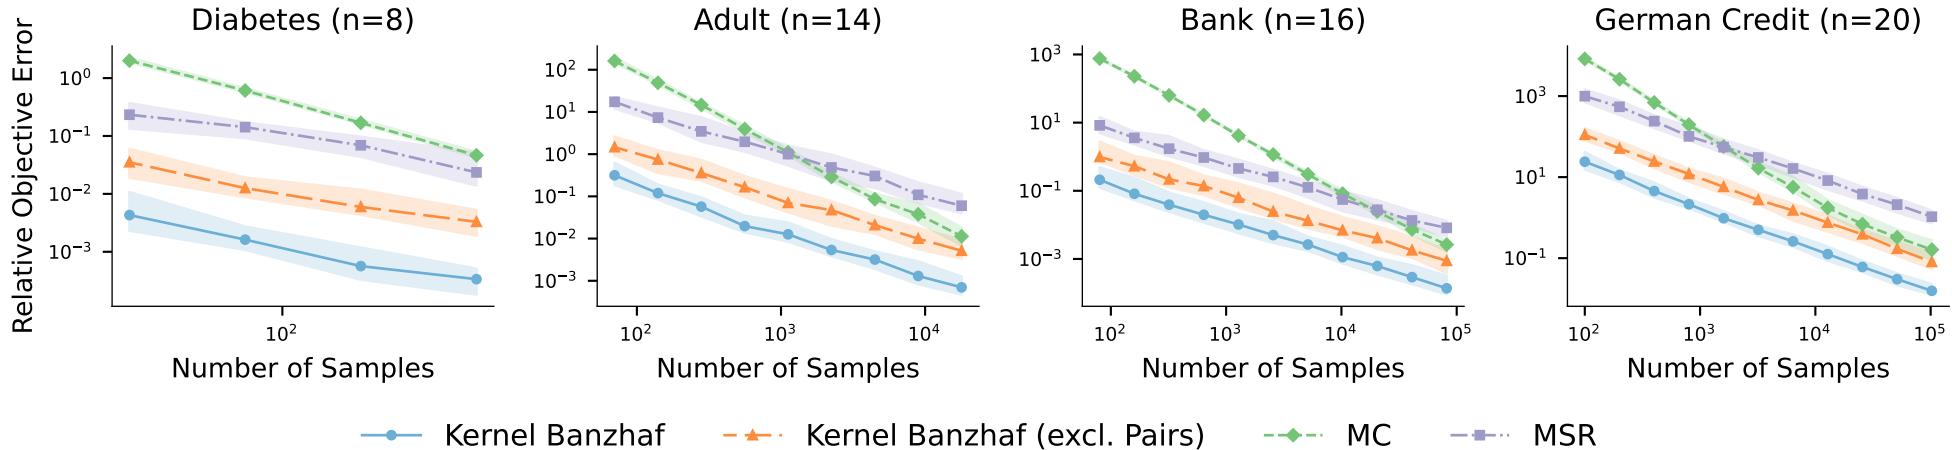

Supplement: supplementary_material [file attachment]

MC (l2-norm: 1.84)

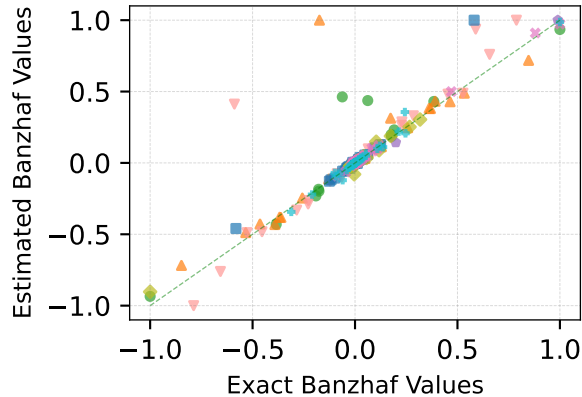

MSR (l2-norm: 0.98)

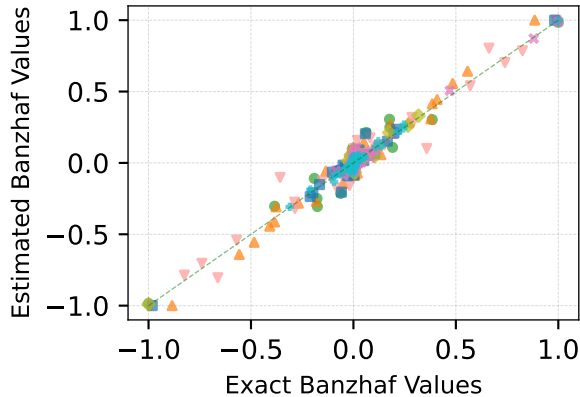

Kernel Banzhaf (l2-norm: 0.18)

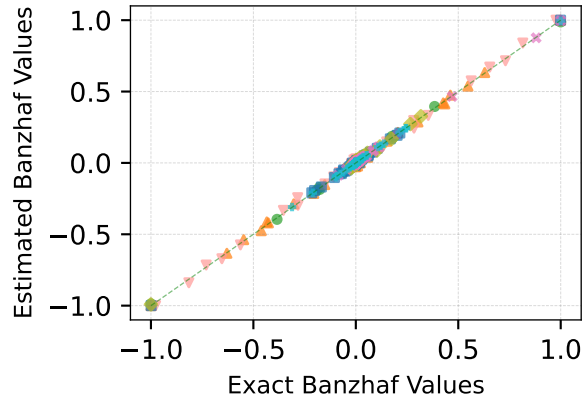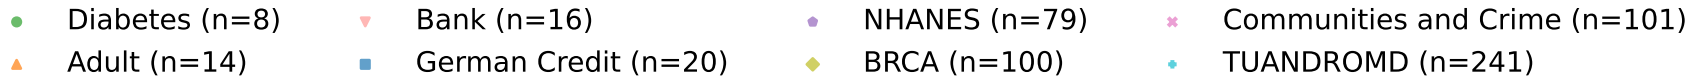

Supplement: supplementary_material [file attachment]
